# Supplementary material for: A machine learning framework to predict PPCP removal through various wastewater and water reuse treatment trains
Source: Environ Sci (Camb). 2024 Dec 19;11(2):481–93. doi: 10.1039/d4ew00892h (PMC11694563; doi:10.1039/d4ew00892h)
Supplement: EW-011-D4EW00892H-s002 [file EW-011-D4EW00892H-s002.xlsx]

## Sheet: Table S1
Supplementary Table S1.
C1 Clustering results based on the most efficient individual unit relative to treatment train influent.
Non-potable Reuse Facility		Potable Reuse Facility
PPCP	Cluster	PPCP	Cluster
Aripiprazole	Primary Clarification	Bezafibrate	Primary Clarification
Bupropion	Primary Clarification	11-nor-9-carboxy-delta-THC	Activated Sludge
Clenbuterol	Primary Clarification	Acetaminophen	Activated Sludge
Desmethylcitalopram	Primary Clarification	Amphetamine	Activated Sludge
Norfentanyl	Primary Clarification	Atorvastatin	Activated Sludge
Dehydroaripiprazole	Primary Clarification	Benzoylecgonine	Activated Sludge
11-nor-9-carboxy-delta-THC	Activated Sludge	Caffeine	Activated Sludge
10,11-dihydro-10-hydroxycarbamazepine	Activated Sludge	Cocaethylene	Activated Sludge
Acetaminophen	Activated Sludge	Cocaine	Activated Sludge
Atenolol	Activated Sludge	Cotinine	Activated Sludge
Atorvastatin	Activated Sludge	Diphenhydramine	Activated Sludge
Benzafibrate	Activated Sludge	Ecgonine methyl ester	Activated Sludge
Benzoylecgonine	Activated Sludge	Gabapentin	Activated Sludge
Buprenorphine	Activated Sludge	gemfibrozil	Activated Sludge
Caffeine	Activated Sludge	Ibuprofen	Activated Sludge
Cocaethylene	Activated Sludge	Metformin	Activated Sludge
Cocaine	Activated Sludge	Methylparaben	Activated Sludge
Cotinine	Activated Sludge	Mevastatin	Activated Sludge
Diclofenac 4-hydroxy	Activated Sludge	m-Hydroxybenzoylecgonine	Activated Sludge
Ecgonine methyl ester	Activated Sludge	Modafinil Acid	Activated Sludge
Famotidine	Activated Sludge	Naproxen	Activated Sludge
Furosemide	Activated Sludge	n-Butylparaben	Activated Sludge
Gabapentin	Activated Sludge	Pioglitazone	Activated Sludge
gemfibrozil	Activated Sludge	Pravastatin	Activated Sludge
Hydromorphone	Activated Sludge	Propanolol	Activated Sludge
Ibuprofen	Activated Sludge	Pseudeophedrine	Activated Sludge
Metformin	Activated Sludge	Quetiapine	Activated Sludge
Methamphetamine	Activated Sludge	Simvastatin	Activated Sludge
Mevastatin	Activated Sludge	Valsartan	Activated Sludge
m-Hydroxybenzoylecgonine	Activated Sludge	Buprenorphine	Coagulation-Sedimentation
Modafinil Acid	Activated Sludge	Duloxetine	Coagulation-Sedimentation
Morphine	Activated Sludge	Methotrexate	Coagulation-Sedimentation
Naproxen	Activated Sludge	Oxymorphone glucuronide	Coagulation-Sedimentation
n-Butylparaben	Activated Sludge	Phenmetrazine	Coagulation-Sedimentation
Normeperidine	Activated Sludge	10,11-dihydro-10-hydroxycarbamazepine	Ozonation
Oxymorphone	Activated Sludge	6-Acetylmorphine	Ozonation
Paroxetine	Activated Sludge	Acebutolol	Ozonation
Phenylpropanolamine	Activated Sludge	Albuterol	Ozonation
Pioglitazone	Activated Sludge	Amitriptyline	Ozonation
Pravastatin	Activated Sludge	Amitriptyline metabolite	Ozonation
Pseudeophedrine	Activated Sludge	Atenolol	Ozonation
Quetiapine	Activated Sludge	Atrazine	Ozonation
Simvastatin	Activated Sludge	Carbamazepine	Ozonation
Triclosan	Activated Sludge	Carbamazepine 10,11 epoxide	Ozonation
Trimethoprim	Activated Sludge	Celecoxib	Ozonation
Valsartan	Activated Sludge	Chlorpheniramine	Ozonation
Amphetamine	Denitrification Filters	Clopidogrel carboxylic acid	Ozonation
Atrazine	Denitrification Filters	Codeine	Ozonation
Carbamazepine 10,11 epoxide	Denitrification Filters	Desmethylcitalopram	Ozonation
Fluoxetine	Denitrification Filters	Desmethylvenlafaxine	Ozonation
Hydrocodone	Denitrification Filters	Dextromethorphan	Ozonation
Lidocaine	Denitrification Filters	Diclofenac	Ozonation
Meprobamate	Denitrification Filters	Diclofenac 4-hydroxy	Ozonation
Nifedipine oxidized	Denitrification Filters	Diltiazem	Ozonation
Norverapamil	Denitrification Filters	Disopyramide	Ozonation
Oxcarbazepine	Denitrification Filters	EDDP	Ozonation
Primidone	Denitrification Filters	Erythromycin	Ozonation
Sulfamethazine	Denitrification Filters	Erythromycin-anhydro	Ozonation
Temazepam	Denitrification Filters	Escitalopram	Ozonation
Triclocarban	Denitrification Filters	Famotidine	Ozonation
Tylosin	Denitrification Filters	Fentanyl	Ozonation
6-Acetylmorphine	Chlorination	Fluoxetine	Ozonation
Acebutolol	Chlorination	Furosemide	Ozonation
Albuterol	Chlorination	Glyburide	Ozonation
Amitriptyline	Chlorination	Hydrochlorothiazide	Ozonation
Amitriptyline metabolite	Chlorination	Hydrocodone	Ozonation
Carbamazepine	Chlorination	Hydromorphone	Ozonation
Carisoprodol	Chlorination	Hydroxybupropion	Ozonation
Celecoxib	Chlorination	Levorphanol	Ozonation
Chlorpheniramine	Chlorination	Lidocaine	Ozonation
Clopidogrel carboxylic acid	Chlorination	Loratadine	Ozonation
Codeine	Chlorination	MDA	Ozonation
Desmethylvenlafaxine	Chlorination	MDEA	Ozonation
Dextromethorphan	Chlorination	Mefenamic acid	Ozonation
Diclofenac	Chlorination	Meperidine	Ozonation
Diltiazem	Chlorination	Methadone	Ozonation
Diphenhydramine	Chlorination	Methamphetamine	Ozonation
Disopyramide	Chlorination	Methylphenidrate	Ozonation
Donepezil	Chlorination	Metoprolol	Ozonation
Duloxetine	Chlorination	Monoethylglycinexylidide	Ozonation
EDDP	Chlorination	Montelukast	Ozonation
Escitalopram	Chlorination	Morphine	Ozonation
Fentanyl	Chlorination	Nifedipine	Ozonation
Glyburide	Chlorination	Norfentanyl	Ozonation
Hydrochlorothiazide	Chlorination	Norquetiapine	Ozonation
Hydroxybupropion	Chlorination	Norsertraline	Ozonation
Lamotrigine	Chlorination	Norverapamil	Ozonation
Levorphanol	Chlorination	Omeprazole	Ozonation
Loratadine	Chlorination	Oxazepam	Ozonation
MDMA	Chlorination	Oxcarbazepine	Ozonation
Meperidine	Chlorination	Oxycodone	Ozonation
Methadone	Chlorination	Oxymorphone	Ozonation
Methylparaben	Chlorination	Phenorbarbital	Ozonation
Methylphenidrate	Chlorination	Phentermine	Ozonation
Metoprolol	Chlorination	Phenytoin	Ozonation
Modafinil	Chlorination	Primidone	Ozonation
Monoethylglycinexylidide	Chlorination	Ritalinic acid	Ozonation
Montelukast	Chlorination	Sildenafil	Ozonation
Nifedipine	Chlorination	Sotalol	Ozonation
Norfluoxetine	Chlorination	Sulfamethazine	Ozonation
Norquetiapine	Chlorination	Sulfamethoxazole	Ozonation
Norsertraline	Chlorination	Sumatriptan	Ozonation
Omeprazole	Chlorination	Tadalafil	Ozonation
Oxazepam	Chlorination	Temazepam	Ozonation
Oxycodone	Chlorination	Thiabendazole	Ozonation
Phenmetrazine	Chlorination	Tramadol	Ozonation
Phenorbarbital	Chlorination	Trazadone	Ozonation
Phentermine	Chlorination	Triamterene	Ozonation
Phenytoin	Chlorination	Triclocarban	Ozonation
Propanolol	Chlorination	Triclosan	Ozonation
Ritalinic acid	Chlorination	Trimethoprim	Ozonation
Sertraline	Chlorination	Tylosin	Ozonation
Sildenafil	Chlorination	Venlafaxine	Ozonation
Sotalol	Chlorination	Verapamil	Ozonation
Sulfamethoxazole	Chlorination	Warfarin	Ozonation
Sumatriptan	Chlorination	Zolpidem	Ozonation
Tadalafil	Chlorination	Zolpidem phenyl-4-carbpxylic acid	Ozonation
Thiabendazole	Chlorination	Aripiprazole	BAC-GAC
Tramadol	Chlorination	Bupropion	BAC-GAC
Trazadone	Chlorination	Carisoprodol	BAC-GAC
Triamterene	Chlorination	Chlorotetracycline	BAC-GAC
Venlafaxine	Chlorination	Donepezil	BAC-GAC
Verapamil	Chlorination	Lamotrigine	BAC-GAC
Warfarin	Chlorination	Lorazepam	BAC-GAC
Zolpidem	Chlorination	Meprobamate	BAC-GAC
Zolpidem phenyl-4-carbpxylic acid	Chlorination	Modafinil	BAC-GAC
		Nifedipine oxidized	BAC-GAC
		Norfluoxetine	BAC-GAC
		Normeperidine	BAC-GAC
		Paroxetine	BAC-GAC
		Phenylpropanolamine	BAC-GAC
		Sertraline	BAC-GAC
		Clenbuterol	UV Disinfection

## Sheet: Table S2
Supplementary Table S2.
C2 Clustering results based on the removal pattern of PPCP in a given unit process relative to the immediately upstream process.
Non-potable Reuse Facility						Potable Reuse Facility
PPCP	Activated Sludge	Denitrification Filters	Chlorination	cluster		PPCP	Activated Sludge	Coagulation-Sedimentation	Ozonation	BAC-GAC	UV Disinfection	Chlorination	cluster
11-nor-9-carboxy-delta-THC	up	B.D.	up	A		Acebutolol	up	down	up	up	down	up	D
Acetaminophen	up	same	same	A		Acetaminophen	up	down	up	up	B.D.	B.D.	D
Benzafibrate	up	B.D.	B.D.	A		Albuterol	up	up	up	down	down	up	D
Cocaethylene	up	B.D.	B.D.	A		Amitriptyline	down	down	up	down	down	down	D
Cocaine	up	B.D.	B.D.	A		Amitriptyline metabolite	up	down	up	same	same	B.D.	D
Modafinil Acid	up	B.D.	B.D.	A		Amphetamine	up	down	down	up	up	up	D
n-Butylparaben	up	B.D.	B.D.	A		Atenolol	up	down	up	same	same	B.D.	D
Pravastatin	up	B.D.	B.D.	A		Benzoylecgonine	up	down	up	up	down	up	D
Dehydroaripiprazole	B.D.	B.D.	B.D.	A		Buprenorphine	up	down	down	up	down	up	D
10,11-dihydro-10-hydroxycarbamazepine	up	down	down	B		Caffeine	up	down	up	down	up	down	D
Amitriptyline metabolite	up	down	up	B		Carbamazepine	up	up	up	down	down	up	D
Aripiprazole	up	down	down	B		Clenbuterol	up	up	up	down	up	up	D
Atenolol	up	down	down	B		Cocaine	up	down	up	B.D.	up	up	D
Atorvastatin	up	down	up	B		Cotinine	up	down	up	up	down	up	D
Benzoylecgonine	up	down	down	B		Desmethylcitalopram	down	up	up	down	down	up	D
Buprenorphine	up	down	down	B		Desmethylvenlafaxine	down	down	up	down	down	up	D
Caffeine	up	down	up	B		Dextromethorphan	same	up	up	same	down	up	D
Clenbuterol	B.D.	down	up	B		Diltiazem	up	down	up	down	down	up	D
Codeine	up	up	up	B		Diphenhydramine	up	down	up	down	up	down	D
Cotinine	up	down	down	B		Duloxetine	down	down	up	down	up	B.D.	D
Diclofenac 4-hydroxy	up	down	up	B		Ecgonine methyl ester	up	down	up	down	up	up	D
Diphenhydramine	up	down	up	B		Erythromycin	up	down	up	down	up	up	D
Disopyramide	up	up	up	B		Erythromycin-anhydro	up	down	up	down	up	same	D
Ecgonine methyl ester	up	down	down	B		Escitalopram	down	up	up	down	down	up	D
Famotidine	up	down	up	B		Fentanyl	down	up	up	down	down	up	D
Furosemide	up	down	up	B		Fluoxetine	down	down	up	down	down	up	D
Gabapentin	up	down	up	B		Gabapentin	up	down	up	up	down	down	D
gemfibrozil	up	down	up	B		Hydrocodone	up	down	up	B.D.	up	B.D.	D
Hydromorphone	up	down	up	B		Hydromorphone	up	down	up	down	up	down	D
Ibuprofen	up	down	up	B		Ibuprofen	up	down	down	up	down	up	D
Metformin	up	down	up	B		MDEA	up	down	up	up	down	up	D
Methamphetamine	up	down	up	B		MDMA	up	down	up	down	up	up	D
Methylparaben	up	down	up	B		Meperidine	down	up	up	down	down	up	D
Mevastatin	up	down	up	B		Metformin	up	down	down	up	up	up	D
m-Hydroxybenzoylecgonine	up	down	down	B		Methadone	up	down	up	up	down	up	D
Montelukast	down	down	up	B		Methotrexate	up	up	down	up	down	up	D
Morphine	up	down	up	B		Mevastatin	up	down	up	up	B.D.	up	D
Naproxen	up	down	up	B		m-Hydroxybenzoylecgonine	up	down	up	down	down	up	D
Norfluoxetine	up	down	up	B		Modafinil Acid	up	down	up	up	up	B.D.	D
Normeperidine	up	down	down	B		n-Butylparaben	up	up	B.D.	B.D.	up	up	D
Oxymorphone	up	down	up	B		Nifedipine	down	down	up	down	up	down	D
Paroxetine	up	down	up	B		Norquetiapine	down	up	up	down	down	up	D
Phenylpropanolamine	up	down	down	B		Norsertraline	down	down	up	up	down	up	D
Pioglitazone	up	down	up	B		Omeprazole	up	down	up	same	down	down	D
Pseudeophedrine	up	down	up	B		Oxycodone	down	up	up	down	down	up	D
Quetiapine	up	down	up	B		Oxymorphone	up	down	up	same	down	up	D
Simvastatin	up	down	up	B		Paroxetine	up	up	up	up	down	up	D
Sulfamethoxazole	up	down	up	B		Phenylpropanolamine	up	down	up	up	down	down	D
Sumatriptan	down	down	up	B		Pioglitazone	up	down	up	same	B.D.	up	D
Triclosan	up	down	up	B		Quetiapine	up	down	up	same	B.D.	up	D
Trimethoprim	up	down	up	B		Tadalafil	down	up	up	down	down	up	D
Valsartan	up	down	down	B		Tramadol	down	up	up	down	up	up	D
6-Acetylmorphine	down	up	up	C		Triclocarban	down	up	up	down	down	up	D
Acebutolol	down	up	down	C		Triclosan	up	down	up	down	down	up	D
Albuterol	down	up	up	C		Valsartan	up	down	up	up	same	down	D
Amitriptyline	down	up	up	C		Verapamil	down	down	up	down	up	down	D
Amphetamine	down	up	down	C		Zolpidem	down	up	up	down	up	up	D
Atrazine	down	up	down	C		10,11-dihydro-10-hydroxycarbamazepine	down	up	up	up	down	up	E
Bupropion	down	up	up	C		6-Acetylmorphine	down	up	up	up	down	down	E
Carbamazepine	down	up	up	C		Aripiprazole	down	down	up	up	down	down	E
Carbamazepine 10,11 epoxide	down	up	down	C		Atrazine	down	up	up	up	down	down	E
Carisoprodol	down	up	up	C		Bupropion	down	up	up	up	down	down	E
Celecoxib	down	up	up	C		Carbamazepine 10,11 epoxide	down	up	up	up	down	down	E
Chlorpheniramine	down	up	up	C		Carisoprodol	down	up	up	up	up	down	E
Clopidogrel carboxylic acid	down	up	up	C		Chlorotetracycline	B.D.	up	down	up	down	up	E
Desmethylcitalopram	down	up	down	C		Chlorpheniramine	down	up	up	same	down	up	E
Desmethylvenlafaxine	down	up	up	C		Clopidogrel carboxylic acid	down	up	up	B.D.	up	down	E
Dextromethorphan	down	up	up	C		Disopyramide	down	up	up	down	up	down	E
Diclofenac	down	up	up	C		Donepezil	down	up	down	up	down	down	E
Diltiazem	down	up	up	C		EDDP	down	up	up	up	down	up	E
Donepezil	down	up	up	C		Glyburide	down	up	up	same	down	up	E
Duloxetine	down	up	same	C		Hydroxybupropion	down	up	up	up	down	up	E
EDDP	down	up	up	C		Lamotrigine	down	up	up	up	down	down	E
Escitalopram	down	up	up	C		Levorphanol	down	up	up	same	down	up	E
Fentanyl	down	up	up	C		Lidocaine	down	up	up	down	up	down	E
Fluoxetine	down	up	up	C		Loratadine	down	up	up	up	down	up	E
Glyburide	down	up	up	C		Lorazepam	up	up	up	up	down	down	E
Hydrochlorothiazide	down	up	up	C		Mefenamic acid	down	up	up	down	up	down	E
Hydrocodone	down	up	up	C		Meprobamate	down	up	up	up	down	down	E
Hydroxybupropion	down	up	up	C		Methamphetamine	down	up	down	up	up	same	E
Lamotrigine	down	up	up	C		Methylparaben	down	up	down	up	down	down	E
Levorphanol	down	up	up	C		Metoprolol	down	up	up	same	down	down	E
Lidocaine	down	up	up	C		Modafinil	down	up	down	up	down	up	E
Loratadine	down	up	down	C		Morphine	down	up	up	same	down	up	E
MDMA	down	up	up	C		Nifedipine oxidized	down	up	up	up	down	down	E
Meperidine	down	up	up	C		Norfentanyl	down	up	up	down	up	down	E
Meprobamate	down	up	down	C		Norfluoxetine	down	up	up	up	down	up	E
Methadone	down	up	up	C		Normeperidine	down	up	down	up	down	down	E
Methylphenidrate	down	up	up	C		Oxazepam	down	up	up	up	down	same	E
Metoprolol	down	up	up	C		Oxcarbazepine	down	up	up	up	down	down	E
Modafinil	down	up	up	C		Oxymorphone glucuronide	down	up	down	up	down	up	E
Monoethylglycinexylidide	down	up	up	C		Phenmetrazine	down	down	up	up	up	B.D.	E
Nifedipine	down	up	up	C		Phentermine	down	down	up	same	down	down	E
Nifedipine oxidized	down	up	down	C		Phenytoin	down	up	up	up	up	B.D.	E
Norfentanyl	down	up	down	C		Primidone	down	up	up	up	down	down	E
Norquetiapine	down	up	up	C		Ritalinic acid	down	up	up	down	down	down	E
Norsertraline	down	up	up	C		Sertraline	down	up	up	up	down	up	E
Norverapamil	down	up	up	C		Sildenafil	down	up	up	same	down	up	E
Omeprazole	down	up	up	C		Sulfamethazine	down	up	up	down	up	down	E
Oxazepam	down	up	up	C		Sulfamethoxazole	same	up	up	down	down	down	E
Oxcarbazepine	down	up	down	C		Sumatriptan	down	up	up	down	same	down	E
Oxycodone	down	up	up	C		Temazepam	down	up	up	up	same	B.D.	E
Phenmetrazine	down	up	up	C		Thiabendazole	down	up	up	same	down	up	E
Phenorbarbital	down	up	up	C		Tylosin	down	up	up	down	up	down	E
Phentermine	down	up	up	C		Venlafaxine	down	up	up	same	down	up	E
Phenytoin	down	up	up	C		11-nor-9-carboxy-delta-THC	up	B.D.	B.D.	B.D.	B.D.	B.D.	F
Primidone	down	up	down	C		Atorvastatin	up	down	up	B.D.	B.D.	B.D.	F
Propanolol	down	up	up	C		Bezafibrate	same	down	up	B.D.	B.D.	B.D.	F
Ritalinic acid	down	up	up	C		Celecoxib	down	up	down	up	B.D.	B.D.	F
Sertraline	down	up	up	C		Cocaethylene	up	B.D.	B.D.	B.D.	B.D.	B.D.	F
Sildenafil	down	up	up	C		Codeine	down	same	up	same	B.D.	B.D.	F
Sotalol	down	up	up	C		Diclofenac	down	up	up	same	B.D.	B.D.	F
Sulfamethazine	down	up	down	C		Diclofenac 4-hydroxy	down	up	up	same	B.D.	B.D.	F
Tadalafil	down	up	up	C		Famotidine	same	down	up	B.D.	B.D.	B.D.	F
Temazepam	down	up	up	C		Furosemide	up	down	up	B.D.	B.D.	B.D.	F
Thiabendazole	down	up	down	C		gemfibrozil	up	down	up	B.D.	B.D.	B.D.	F
Tramadol	down	up	up	C		Hydrochlorothiazide	down	same	up	same	B.D.	B.D.	F
Trazadone	down	up	up	C		MDA	down	up	up	same	same	B.D.	F
Triamterene	down	up	up	C		Methylphenidrate	down	up	up	B.D.	B.D.	B.D.	F
Triclocarban	down	up	up	C		Monoethylglycinexylidide	down	up	up	same	same	B.D.	F
Tylosin	down	up	up	C		Montelukast	down	up	up	same	B.D.	B.D.	F
Venlafaxine	down	up	up	C		Naproxen	up	down	up	B.D.	B.D.	B.D.	F
Verapamil	down	up	up	C		Norverapamil	down	down	up	B.D.	up	B.D.	F
Warfarin	down	up	up	C		Phenorbarbital	down	up	up	down	up	B.D.	F
Zolpidem	down	up	up	C		Pravastatin	up	B.D.	B.D.	B.D.	B.D.	B.D.	F
Zolpidem phenyl-4-carbpxylic acid	down	up	up	C		Propanolol	up	B.D.	B.D.	B.D.	B.D.	B.D.	F
						Pseudeophedrine	up	down	up	B.D.	B.D.	B.D.	F
						Simvastatin	up	B.D.	B.D.	B.D.	B.D.	B.D.	F
						Sotalol	down	up	up	B.D.	B.D.	B.D.	F
						Trazadone	down	up	up	B.D.	B.D.	up	F
						Triamterene	down	up	up	same	same	B.D.	F
						Trimethoprim	down	up	up	B.D.	B.D.	B.D.	F
						Warfarin	down	up	up	B.D.	B.D.	B.D.	F
						Zolpidem phenyl-4-carbpxylic acid	down	up	up	B.D.	B.D.	B.D.	F

## Sheet: Table S3
Supplementary Table S3.
Average accuracy results for PPCP prediction based on ML-based classifiers with the different combination of the parameters. 5-fold cross validation was performed.
Support vector machine (SVM)
Kernel	Penalty parameter (C)	RBF kernel coeff (Gamma)	C1 approach		C2 approach
			Non-potable Reuse Facility	Potable Reuse Facility	Non-potable Reuse Facility	Potable Reuse Facility
RBF	2-5	2-15	0.5304	0.745	0.5883	0.4329
RBF	2-5	2-13	0.5304	0.745	0.5883	0.4329
RBF	2-5	2-11	0.5304	0.745	0.5883	0.4329
RBF	2-5	2-9	0.5304	0.745	0.5883	0.4329
RBF	2-5	2-7	0.5304	0.745	0.5883	0.4329
RBF	2-5	2-5	0.5304	0.745	0.5883	0.4329
RBF	2-5	2-3	0.5304	0.745	0.5883	0.4329
RBF	2-5	2-1	0.5304	0.745	0.5883	0.4329
RBF	2-5	21	0.5304	0.745	0.5883	0.4329
RBF	2-5	23	0.5304	0.745	0.5883	0.4329
RBF	2-3	2-15	0.5304	0.745	0.5883	0.4329
RBF	2-3	2-13	0.5304	0.745	0.5883	0.4329
RBF	2-3	2-11	0.5304	0.745	0.5883	0.4329
RBF	2-3	2-9	0.5304	0.745	0.5883	0.4329
RBF	2-3	2-7	0.5304	0.745	0.5883	0.4329
RBF	2-3	2-5	0.5304	0.745	0.5883	0.4329
RBF	2-3	2-3	0.5304	0.745	0.5883	0.4329
RBF	2-3	2-1	0.5304	0.745	0.5883	0.4329
RBF	2-3	21	0.5304	0.745	0.5883	0.4329
RBF	2-3	23	0.5304	0.745	0.5883	0.4329
RBF	2-1	2-15	0.5304	0.745	0.5883	0.4329
RBF	2-1	2-13	0.5304	0.745	0.5883	0.4329
RBF	2-1	2-11	0.5304	0.745	0.5883	0.4329
RBF	2-1	2-9	0.5304	0.745	0.5883	0.4329
RBF	2-1	2-7	0.5304	0.745	0.5883	0.4329
RBF	2-1	2-5	0.5304	0.745	0.5883	0.4329
RBF	2-1	2-3	0.5304	0.745	0.5883	0.4329
RBF	2-1	2-1	0.5304	0.745	0.5883	0.4329
RBF	2-1	21	0.5217	0.745	0.5883	0.4329
RBF	2-1	23	0.4957	0.7355	0.58	0.4175
RBF	20	2-15	0.5304	0.745	0.5883	0.4329
RBF	20	2-13	0.5304	0.745	0.5883	0.4329
RBF	20	2-11	0.5304	0.745	0.5883	0.4329
RBF	20	2-9	0.5304	0.745	0.5883	0.4329
RBF	20	2-7	0.5304	0.745	0.5883	0.4329
RBF	20	2-5	0.5304	0.745	0.5883	0.4329
RBF	20	2-3	0.5304	0.745	0.5883	0.4329
RBF	20	2-1	0.5304	0.745	0.5883	0.4329
RBF	20	21	0.5217	0.7264	0.5883	0.4406
RBF	20	23	0.4957	0.7169	0.547	0.4326
RBF	21	2-15	0.5304	0.745	0.5883	0.4329
RBF	21	2-13	0.5304	0.745	0.5883	0.4329
RBF	21	2-11	0.5304	0.745	0.5883	0.4329
RBF	21	2-9	0.5304	0.745	0.5883	0.4329
RBF	21	2-7	0.5304	0.745	0.5883	0.4329
RBF	21	2-5	0.5304	0.745	0.5883	0.4329
RBF	21	2-3	0.5304	0.745	0.5883	0.4329
RBF	21	2-1	0.5391	0.745	0.5883	0.4252
RBF	21	21	0.5043	0.726	0.5717	0.4246
RBF	21	23	0.5043	0.7359	0.53	0.4018
RBF	23	2-15	0.5304	0.745	0.5883	0.4329
RBF	23	2-13	0.5304	0.745	0.5883	0.4329
RBF	23	2-11	0.5304	0.745	0.5883	0.4329
RBF	23	2-9	0.5304	0.745	0.5883	0.4329
RBF	23	2-7	0.5304	0.745	0.5883	0.4329
RBF	23	2-5	0.5304	0.745	0.5883	0.4329
RBF	23	2-3	0.5304	0.745	0.5883	0.4329
RBF	23	2-1	0.513	0.726	0.5963	0.4012
RBF	23	21	0.5217	0.7355	0.555	0.4095
RBF	23	23	0.5217	0.7636	0.5797	0.4483
RBF	25	2-15	0.5304	0.745	0.5883	0.4329
RBF	25	2-13	0.5304	0.745	0.5883	0.4329
RBF	25	2-11	0.5304	0.745	0.5883	0.4329
RBF	25	2-9	0.5304	0.745	0.5883	0.4329
RBF	25	2-7	0.5304	0.745	0.5883	0.4329
RBF	25	2-5	0.5304	0.745	0.5883	0.4329
RBF	25	2-3	0.4957	0.7355	0.5883	0.3935
RBF	25	2-1	0.513	0.7069	0.5633	0.4166
RBF	25	21	0.5391	0.7636	0.5217	0.4252
RBF	25	23	0.4957	0.7732	0.538	0.3865
Linear	2-5	-	0.5304	0.745	0.5883	0.4329
Linear	2-3	-	0.5304	0.745	0.5883	0.4329
Linear	2-1	-	0.5304	0.745	0.5883	0.4329
Linear	20	-	0.5304	0.745	0.5883	0.4329
Linear	21	-	0.5304	0.745	0.5883	0.4329
Linear	23	-	0.4696	0.745	0.5883	0.4175
Linear	25	-	0.4522	0.745	0.5883	0.4175
Random Forest (RF)
Split criteria (criterion)	# of trees (estimators)	The minimum # of samples in a leaf node (min_samples_leaf)	C1 approach		C2 approach
			Non-potable Reuse Facility	Potable Reuse Facility	Non-potable Reuse Facility	Potable Reuse Facility
Gini impurity	100	1	0.5391	0.7636	0.5297	0.4169
Gini impurity	100	2	0.5565	0.7641	0.5463	0.4089
Gini impurity	100	3	0.5304	0.7736	0.5053	0.4403
Gini impurity	100	4	0.5391	0.7926	0.571	0.4406
Gini impurity	100	5	0.513	0.7545	0.5553	0.4634
Gini impurity	300	1	0.5391	0.745	0.5383	0.4092
Gini impurity	300	2	0.5217	0.7736	0.5383	0.4403
Gini impurity	300	3	0.5217	0.7736	0.5383	0.4477
Gini impurity	300	4	0.4957	0.7831	0.53	0.4708
Gini impurity	300	5	0.513	0.7736	0.5387	0.456
Gini impurity	500	1	0.5304	0.7732	0.5627	0.4169
Gini impurity	500	2	0.5304	0.7736	0.538	0.4323
Gini impurity	500	3	0.513	0.7736	0.5383	0.4323
Gini impurity	500	4	0.5217	0.7831	0.5387	0.4557
Gini impurity	500	5	0.513	0.7736	0.547	0.448
Gini impurity	700	1	0.5217	0.745	0.563	0.3938
Gini impurity	700	2	0.5217	0.7641	0.555	0.44
Gini impurity	700	3	0.5478	0.7736	0.522	0.4477
Gini impurity	700	4	0.5565	0.7831	0.5303	0.4634
Gini impurity	700	5	0.5043	0.7831	0.5387	0.4474
Gini impurity	900	1	0.5304	0.7636	0.5633	0.4249
Gini impurity	900	2	0.5304	0.7736	0.5547	0.432
Gini impurity	900	3	0.5478	0.7736	0.5467	0.4711
Gini impurity	900	4	0.5304	0.7736	0.5303	0.4631
Gini impurity	900	5	0.5304	0.7736	0.555	0.4634
Information gain	100	1	0.5478	0.7736	0.5467	0.4169
Information gain	100	2	0.5304	0.7545	0.5557	0.44
Information gain	100	3	0.5217	0.7736	0.547	0.4631
Information gain	100	4	0.5478	0.7831	0.53	0.4477
Information gain	100	5	0.4957	0.7641	0.555	0.3862
Information gain	300	1	0.5304	0.7732	0.5543	0.4089
Information gain	300	2	0.5043	0.7641	0.5387	0.4243
Information gain	300	3	0.513	0.7736	0.5467	0.4474
Information gain	300	4	0.5217	0.7831	0.5383	0.4246
Information gain	300	5	0.4957	0.7641	0.5387	0.4246
Information gain	500	1	0.5217	0.7732	0.555	0.4326
Information gain	500	2	0.5391	0.7641	0.5383	0.4166
Information gain	500	3	0.5217	0.7736	0.522	0.432
Information gain	500	4	0.5217	0.7736	0.5387	0.4166
Information gain	500	5	0.4696	0.7641	0.547	0.4243
Information gain	700	1	0.5217	0.7732	0.5383	0.4092
Information gain	700	2	0.5217	0.7736	0.5383	0.4012
Information gain	700	3	0.5304	0.7736	0.5467	0.4557
Information gain	700	4	0.5217	0.7736	0.5383	0.44
Information gain	700	5	0.4957	0.7736	0.5553	0.44
Information gain	900	1	0.5304	0.7732	0.5467	0.4092
Information gain	900	2	0.513	0.7641	0.5547	0.4323
Information gain	900	3	0.5217	0.7736	0.522	0.4166
Information gain	900	4	0.513	0.7736	0.5303	0.4323
Information gain	900	5	0.5217	0.7641	0.547	0.4169
Logistic Regression (LR)
max_iter (maximum number of iterations to converge)	Penalty parameter (C)	C1 approach		C2 approach
		Non-potable Reuse Facility	Potable Reuse Facility	Non-potable Reuse Facility	Potable Reuse Facility
100	2-5	0.5304	0.745	0.5883	0.4098
100	2-3	0.5304	0.745	0.5883	0.4098
100	2-1	0.5304	0.745	0.5883	0.4022
100	20	0.487	0.745	0.58	0.4098
100	21	0.5043	0.745	0.5883	0.4102
100	23	0.5043	0.745	0.5717	0.3708
100	25	0.513	0.7636	0.5633	0.3788
200	2-5	0.5304	0.745	0.5883	0.4098
200	2-3	0.5304	0.745	0.5883	0.4098
200	2-1	0.5304	0.745	0.5883	0.4022
200	20	0.487	0.745	0.58	0.4098
200	21	0.5043	0.745	0.5883	0.4102
200	23	0.5043	0.745	0.5717	0.3708
200	25	0.513	0.7636	0.5633	0.3788
300	2-5	0.5304	0.745	0.5883	0.4098
300	2-3	0.5304	0.745	0.5883	0.4098
300	2-1	0.5304	0.745	0.5883	0.4022
300	20	0.487	0.745	0.58	0.4098
300	21	0.5043	0.745	0.5883	0.4102
300	23	0.5043	0.745	0.5717	0.3708
300	25	0.513	0.7636	0.5633	0.3788
400	2-5	0.5304	0.745	0.5883	0.4098
400	2-3	0.5304	0.745	0.5883	0.4098
400	2-1	0.5304	0.745	0.5883	0.4022
400	20	0.487	0.745	0.58	0.4098
400	21	0.5043	0.745	0.5883	0.4102
400	23	0.5043	0.745	0.5717	0.3708
400	25	0.513	0.7636	0.5633	0.3788
500	2-5	0.5304	0.745	0.5883	0.4098
500	2-3	0.5304	0.745	0.5883	0.4098
500	2-1	0.5304	0.745	0.5883	0.4022
500	20	0.487	0.745	0.58	0.4098
500	21	0.5043	0.745	0.5883	0.4102
500	23	0.5043	0.745	0.5717	0.3708
500	25	0.513	0.7636	0.5633	0.3788

## Sheet: Table S4
Supplementary Table S4.
PPCP clustering results based on the Abraham descriptors with log Kow values, and the clustering results based on the most removal-efficient treatment unit. The overlapped PPCPs were colored.
Non-potable Reuse Facility				Potable Reuse Facility
PPCP	Cluster based on Abraham descriptors and log Kow	Cluster based on the most removal-efficient treatment unit		PPCP	Cluster based on Abraham descriptors and log Kow	Cluster based on the most removal-efficient treatment unit
10,11-dihydro-10-hydroxycarbamazepine	Cluster 1	Activated Sludge		11-nor-9-carboxy-delta-THC	Cluster 1	Activated Sludge
11-nor-9-carboxy-delta-THC	Cluster 1	Activated Sludge		Acetaminophen	Cluster 1	Activated Sludge
Buprenorphine	Cluster 1	Activated Sludge		Amphetamine	Cluster 1	Activated Sludge
Diclofenac 4-hydroxy	Cluster 1	Activated Sludge		Benzoylecgonine	Cluster 1	Activated Sludge
Famotidine	Cluster 1	Activated Sludge		Caffeine	Cluster 1	Activated Sludge
Furosemide	Cluster 1	Activated Sludge		Cocaethylene	Cluster 1	Activated Sludge
Hydromorphone	Cluster 1	Activated Sludge		Cocaine	Cluster 1	Activated Sludge
Mevastatin	Cluster 1	Activated Sludge		Cotinine	Cluster 1	Activated Sludge
Modafinil Acid	Cluster 1	Activated Sludge		Diphenhydramine	Cluster 1	Activated Sludge
Morphine	Cluster 1	Activated Sludge		Ecgonine methyl ester	Cluster 1	Activated Sludge
Oxymorphone	Cluster 1	Activated Sludge		Gabapentin	Cluster 1	Activated Sludge
Paroxetine	Cluster 1	Activated Sludge		Ibuprofen	Cluster 1	Activated Sludge
Pioglitazone	Cluster 1	Activated Sludge		Metformin	Cluster 1	Activated Sludge
Pravastatin	Cluster 1	Activated Sludge		Methylparaben	Cluster 1	Activated Sludge
Quetiapine	Cluster 1	Activated Sludge		Mevastatin	Cluster 1	Activated Sludge
Simvastatin	Cluster 1	Activated Sludge		Modafinil Acid	Cluster 1	Activated Sludge
Trimethoprim	Cluster 1	Activated Sludge		Naproxen	Cluster 1	Activated Sludge
m-Hydroxybenzoylecgonine	Cluster 1	Activated Sludge		Pioglitazone	Cluster 1	Activated Sludge
Carbamazepine 10,11 epoxide	Cluster 1	Denitrification Filters		Pravastatin	Cluster 1	Activated Sludge
Hydrocodone	Cluster 1	Denitrification Filters		Propanolol	Cluster 1	Activated Sludge
Nifedipine oxidized	Cluster 1	Denitrification Filters		Simvastatin	Cluster 1	Activated Sludge
Norverapamil	Cluster 1	Denitrification Filters		gemfibrozil	Cluster 1	Activated Sludge
Oxcarbazepine	Cluster 1	Denitrification Filters		m-Hydroxybenzoylecgonine	Cluster 1	Activated Sludge
Sulfamethazine	Cluster 1	Denitrification Filters		n-Butylparaben	Cluster 1	Activated Sludge
Temazepam	Cluster 1	Denitrification Filters		10,11-dihydro-10-hydroxycarbamazepine	Cluster 1	Ozonation
Triclocarban	Cluster 1	Denitrification Filters		6-Acetylmorphine	Cluster 1	Ozonation
6-Acetylmorphine	Cluster 1	Chlorination		Acebutolol	Cluster 1	Ozonation
Acebutolol	Cluster 1	Chlorination		Albuterol	Cluster 1	Ozonation
Amitriptyline	Cluster 1	Chlorination		Amitriptyline	Cluster 1	Ozonation
Amitriptyline metabolite	Cluster 1	Chlorination		Amitriptyline metabolite	Cluster 1	Ozonation
Carbamazepine	Cluster 1	Chlorination		Atenolol	Cluster 1	Ozonation
Celecoxib	Cluster 1	Chlorination		Atrazine	Cluster 1	Ozonation
Clopidogrel carboxylic acid	Cluster 1	Chlorination		Carbamazepine	Cluster 1	Ozonation
Codeine	Cluster 1	Chlorination		Carbamazepine 10,11 epoxide	Cluster 1	Ozonation
Diclofenac	Cluster 1	Chlorination		Celecoxib	Cluster 1	Ozonation
Diltiazem	Cluster 1	Chlorination		Chlorpheniramine	Cluster 1	Ozonation
Disopyramide	Cluster 1	Chlorination		Clopidogrel carboxylic acid	Cluster 1	Ozonation
Donepezil	Cluster 1	Chlorination		Codeine	Cluster 1	Ozonation
Duloxetine	Cluster 1	Chlorination		Desmethylcitalopram	Cluster 1	Ozonation
EDDP	Cluster 1	Chlorination		Desmethylvenlafaxine	Cluster 1	Ozonation
Escitalopram	Cluster 1	Chlorination		Dextromethorphan	Cluster 1	Ozonation
Fentanyl	Cluster 1	Chlorination		Diclofenac	Cluster 1	Ozonation
Glyburide	Cluster 1	Chlorination		Diclofenac 4-hydroxy	Cluster 1	Ozonation
Hydrochlorothiazide	Cluster 1	Chlorination		Disopyramide	Cluster 1	Ozonation
Lamotrigine	Cluster 1	Chlorination		EDDP	Cluster 1	Ozonation
Loratadine	Cluster 1	Chlorination		Escitalopram	Cluster 1	Ozonation
Methadone	Cluster 1	Chlorination		Famotidine	Cluster 1	Ozonation
Modafinil	Cluster 1	Chlorination		Fentanyl	Cluster 1	Ozonation
Montelukast	Cluster 1	Chlorination		Fluoxetine	Cluster 1	Ozonation
Nifedipine	Cluster 1	Chlorination		Furosemide	Cluster 1	Ozonation
Norquetiapine	Cluster 1	Chlorination		Hydrochlorothiazide	Cluster 1	Ozonation
Norsertraline	Cluster 1	Chlorination		Hydrocodone	Cluster 1	Ozonation
Omeprazole	Cluster 1	Chlorination		Hydromorphone	Cluster 1	Ozonation
Oxazepam	Cluster 1	Chlorination		Hydroxybupropion	Cluster 1	Ozonation
Oxycodone	Cluster 1	Chlorination		Levorphanol	Cluster 1	Ozonation
Phenytoin	Cluster 1	Chlorination		Lidocaine	Cluster 1	Ozonation
Propanolol	Cluster 1	Chlorination		Loratadine	Cluster 1	Ozonation
Sertraline	Cluster 1	Chlorination		MDEA	Cluster 1	Ozonation
Sildenafil	Cluster 1	Chlorination		Mefenamic acid	Cluster 1	Ozonation
Sulfamethoxazole	Cluster 1	Chlorination		Meperidine	Cluster 1	Ozonation
Sumatriptan	Cluster 1	Chlorination		Methadone	Cluster 1	Ozonation
Tadalafil	Cluster 1	Chlorination		Methamphetamine	Cluster 1	Ozonation
Thiabendazole	Cluster 1	Chlorination		Metoprolol	Cluster 1	Ozonation
Triamterene	Cluster 1	Chlorination		Monoethylglycinexylidide	Cluster 1	Ozonation
Verapamil	Cluster 1	Chlorination		Morphine	Cluster 1	Ozonation
Warfarin	Cluster 1	Chlorination		Nifedipine	Cluster 1	Ozonation
Zolpidem	Cluster 1	Chlorination		Norfentanyl	Cluster 1	Ozonation
Atorvastatin	Cluster 2	Activated Sludge		Norquetiapine	Cluster 1	Ozonation
Valsartan	Cluster 2	Activated Sludge		Norsertraline	Cluster 1	Ozonation
Tylosin	Cluster 2	Denitrification Filters		Norverapamil	Cluster 1	Ozonation
Tylosin	Cluster 2	Denitrification Filters		Oxazepam	Cluster 1	Ozonation
Acetaminophen	Cluster 3	Activated Sludge		Oxcarbazepine	Cluster 1	Ozonation
Atenolol	Cluster 3	Activated Sludge		Oxycodone	Cluster 1	Ozonation
Benzoylecgonine	Cluster 3	Activated Sludge		Oxymorphone	Cluster 1	Ozonation
Caffeine	Cluster 3	Activated Sludge		Phentermine	Cluster 1	Ozonation
Cocaethylene	Cluster 3	Activated Sludge		Phenytoin	Cluster 1	Ozonation
Cocaine	Cluster 3	Activated Sludge		Primidone	Cluster 1	Ozonation
Cotinine	Cluster 3	Activated Sludge		Ritalinic acid	Cluster 1	Ozonation
Ecgonine methyl ester	Cluster 3	Activated Sludge		Sotalol	Cluster 1	Ozonation
Gabapentin	Cluster 3	Activated Sludge		Sulfamethazine	Cluster 1	Ozonation
Ibuprofen	Cluster 3	Activated Sludge		Sulfamethoxazole	Cluster 1	Ozonation
Metformin	Cluster 3	Activated Sludge		Sumatriptan	Cluster 1	Ozonation
Methamphetamine	Cluster 3	Activated Sludge		Temazepam	Cluster 1	Ozonation
Naproxen	Cluster 3	Activated Sludge		Thiabendazole	Cluster 1	Ozonation
Normeperidine	Cluster 3	Activated Sludge		Tramadol	Cluster 1	Ozonation
Phenylpropanolamine	Cluster 3	Activated Sludge		Triamterene	Cluster 1	Ozonation
Triclosan	Cluster 3	Activated Sludge		Triclocarban	Cluster 1	Ozonation
gemfibrozil	Cluster 3	Activated Sludge		Triclosan	Cluster 1	Ozonation
n-Butylparaben	Cluster 3	Activated Sludge		Trimethoprim	Cluster 1	Ozonation
Amphetamine	Cluster 3	Denitrification Filters		Venlafaxine	Cluster 1	Ozonation
Atrazine	Cluster 3	Denitrification Filters		Warfarin	Cluster 1	Ozonation
Fluoxetine	Cluster 3	Denitrification Filters		Zolpidem	Cluster 1	Ozonation
Lidocaine	Cluster 3	Denitrification Filters		Bupropion	Cluster 1	BAC-GAC
Meprobamate	Cluster 3	Denitrification Filters		Carisoprodol	Cluster 1	BAC-GAC
Primidone	Cluster 3	Denitrification Filters		Lamotrigine	Cluster 1	BAC-GAC
Albuterol	Cluster 3	Chlorination		Lorazepam	Cluster 1	BAC-GAC
Carisoprodol	Cluster 3	Chlorination		Meprobamate	Cluster 1	BAC-GAC
Chlorpheniramine	Cluster 3	Chlorination		Modafinil	Cluster 1	BAC-GAC
Desmethylvenlafaxine	Cluster 3	Chlorination		Nifedipine oxidized	Cluster 1	BAC-GAC
Dextromethorphan	Cluster 3	Chlorination		Norfluoxetine	Cluster 1	BAC-GAC
Diphenhydramine	Cluster 3	Chlorination		Normeperidine	Cluster 1	BAC-GAC
Hydroxybupropion	Cluster 3	Chlorination		Paroxetine	Cluster 1	BAC-GAC
Levorphanol	Cluster 3	Chlorination		Phenylpropanolamine	Cluster 1	BAC-GAC
MDMA	Cluster 3	Chlorination		Sertraline	Cluster 1	BAC-GAC
Meperidine	Cluster 3	Chlorination		Erythromycin	Cluster 2	Ozonation
Methylparaben	Cluster 3	Chlorination		Erythromycin-anhydro	Cluster 2	Ozonation
Metoprolol	Cluster 3	Chlorination		Tylosin	Cluster 2	Ozonation
Monoethylglycinexylidide	Cluster 3	Chlorination		Tylosin	Cluster 2	Ozonation
Norfluoxetine	Cluster 3	Chlorination		Atorvastatin	Cluster 3	Activated Sludge
Phenmetrazine	Cluster 3	Chlorination		Quetiapine	Cluster 3	Activated Sludge
Phentermine	Cluster 3	Chlorination		Valsartan	Cluster 3	Activated Sludge
Ritalinic acid	Cluster 3	Chlorination		Diltiazem	Cluster 3	Ozonation
Sotalol	Cluster 3	Chlorination		Glyburide	Cluster 3	Ozonation
Tramadol	Cluster 3	Chlorination		Montelukast	Cluster 3	Ozonation
Venlafaxine	Cluster 3	Chlorination		Omeprazole	Cluster 3	Ozonation
				Sildenafil	Cluster 3	Ozonation
				Tadalafil	Cluster 3	Ozonation
				Verapamil	Cluster 3	Ozonation
				Aripiprazole	Cluster 3	BAC-GAC
				Chlorotetracycline	Cluster 3	BAC-GAC
				Donepezil	Cluster 3	BAC-GAC

## Sheet: Table S5
Supplementary Table S5.
PPCP clustering results based on the Abraham descriptors with log Kow values, and the clustering results based on the removal pattern. The overlapped PPCPs were colored.
Non-potable Reuse Facility				Potable Reuse Facility
PPCP	Cluster based on Abraham descriptors and log Kow	Cluster based on the removal pattern		PPCP	Cluster based on Abraham descriptors and log Kow	Cluster based on the removal pattern
Acetaminophen	Cluster 1	Cluster A		Acebutolol	Cluster 1	Cluster D
Cocaethylene	Cluster 1	Cluster A		Albuterol	Cluster 1	Cluster D
Cocaine	Cluster 1	Cluster A		Amitriptyline	Cluster 1	Cluster D
n-Butylparaben	Cluster 1	Cluster A		Amitriptyline metabolite	Cluster 1	Cluster D
Benzoylecgonine	Cluster 1	Cluster B		Atenolol	Cluster 1	Cluster D
Caffeine	Cluster 1	Cluster B		Benzoylecgonine	Cluster 1	Cluster D
Cotinine	Cluster 1	Cluster B		Buprenorphine	Cluster 1	Cluster D
Diphenhydramine	Cluster 1	Cluster B		Carbamazepine	Cluster 1	Cluster D
Ecgonine methyl ester	Cluster 1	Cluster B		Desmethylcitalopram	Cluster 1	Cluster D
Gabapentin	Cluster 1	Cluster B		Diltiazem	Cluster 1	Cluster D
Ibuprofen	Cluster 1	Cluster B		Duloxetine	Cluster 1	Cluster D
Metformin	Cluster 1	Cluster B		Escitalopram	Cluster 1	Cluster D
Methamphetamine	Cluster 1	Cluster B		Fentanyl	Cluster 1	Cluster D
Methylparaben	Cluster 1	Cluster B		Hydrocodone	Cluster 1	Cluster D
Norfluoxetine	Cluster 1	Cluster B		Hydromorphone	Cluster 1	Cluster D
Normeperidine	Cluster 1	Cluster B		Methadone	Cluster 1	Cluster D
Phenylpropanolamine	Cluster 1	Cluster B		Mevastatin	Cluster 1	Cluster D
gemfibrozil	Cluster 1	Cluster B		Modafinil Acid	Cluster 1	Cluster D
Amphetamine	Cluster 1	Cluster C		Nifedipine	Cluster 1	Cluster D
Atrazine	Cluster 1	Cluster C		Norquetiapine	Cluster 1	Cluster D
Bupropion	Cluster 1	Cluster C		Norsertraline	Cluster 1	Cluster D
Carisoprodol	Cluster 1	Cluster C		Omeprazole	Cluster 1	Cluster D
Chlorpheniramine	Cluster 1	Cluster C		Oxycodone	Cluster 1	Cluster D
Dextromethorphan	Cluster 1	Cluster C		Oxymorphone	Cluster 1	Cluster D
Fluoxetine	Cluster 1	Cluster C		Paroxetine	Cluster 1	Cluster D
Hydroxybupropion	Cluster 1	Cluster C		Pioglitazone	Cluster 1	Cluster D
Levorphanol	Cluster 1	Cluster C		Quetiapine	Cluster 1	Cluster D
Lidocaine	Cluster 1	Cluster C		Triclocarban	Cluster 1	Cluster D
MDMA	Cluster 1	Cluster C		Verapamil	Cluster 1	Cluster D
Meperidine	Cluster 1	Cluster C		Zolpidem	Cluster 1	Cluster D
Meprobamate	Cluster 1	Cluster C		m-Hydroxybenzoylecgonine	Cluster 1	Cluster D
Metoprolol	Cluster 1	Cluster C		10,11-dihydro-10-hydroxycarbamazepine	Cluster 1	Cluster E
Monoethylglycinexylidide	Cluster 1	Cluster C		6-Acetylmorphine	Cluster 1	Cluster E
Norfentanyl	Cluster 1	Cluster C		Aripiprazole	Cluster 1	Cluster E
Phenmetrazine	Cluster 1	Cluster C		Carbamazepine 10,11 epoxide	Cluster 1	Cluster E
Phentermine	Cluster 1	Cluster C		Clopidogrel carboxylic acid	Cluster 1	Cluster E
Primidone	Cluster 1	Cluster C		Disopyramide	Cluster 1	Cluster E
Ritalinic acid	Cluster 1	Cluster C		Donepezil	Cluster 1	Cluster E
Sotalol	Cluster 1	Cluster C		EDDP	Cluster 1	Cluster E
Tramadol	Cluster 1	Cluster C		Lamotrigine	Cluster 1	Cluster E
Venlafaxine	Cluster 1	Cluster C		Loratadine	Cluster 1	Cluster E
Dehydroaripiprazole	Cluster 2	Cluster A		Lorazepam	Cluster 1	Cluster E
Aripiprazole	Cluster 2	Cluster B		Modafinil	Cluster 1	Cluster E
Atorvastatin	Cluster 2	Cluster B		Morphine	Cluster 1	Cluster E
Buprenorphine	Cluster 2	Cluster B		Nifedipine oxidized	Cluster 1	Cluster E
Montelukast	Cluster 2	Cluster B		Oxazepam	Cluster 1	Cluster E
Valsartan	Cluster 2	Cluster B		Oxcarbazepine	Cluster 1	Cluster E
Glyburide	Cluster 2	Cluster C		Phenytoin	Cluster 1	Cluster E
Sildenafil	Cluster 2	Cluster C		Sertraline	Cluster 1	Cluster E
Tadalafil	Cluster 2	Cluster C		Sulfamethazine	Cluster 1	Cluster E
Tylosin	Cluster 2	Cluster C		Sulfamethoxazole	Cluster 1	Cluster E
Tylosin	Cluster 2	Cluster C		Sumatriptan	Cluster 1	Cluster E
Verapamil	Cluster 2	Cluster C		Temazepam	Cluster 1	Cluster E
11-nor-9-carboxy-delta-THC	Cluster 3	Cluster A		Thiabendazole	Cluster 1	Cluster E
Modafinil Acid	Cluster 3	Cluster A		11-nor-9-carboxy-delta-THC	Cluster 1	Cluster F
Pravastatin	Cluster 3	Cluster A		Bezafibrate	Cluster 1	Cluster F
10,11-dihydro-10-hydroxycarbamazepine	Cluster 3	Cluster B		Celecoxib	Cluster 1	Cluster F
Amitriptyline metabolite	Cluster 3	Cluster B		Codeine	Cluster 1	Cluster F
Atenolol	Cluster 3	Cluster B		Diclofenac	Cluster 1	Cluster F
Clenbuterol	Cluster 3	Cluster B		Diclofenac 4-hydroxy	Cluster 1	Cluster F
Codeine	Cluster 3	Cluster B		Famotidine	Cluster 1	Cluster F
Diclofenac 4-hydroxy	Cluster 3	Cluster B		Furosemide	Cluster 1	Cluster F
Disopyramide	Cluster 3	Cluster B		Hydrochlorothiazide	Cluster 1	Cluster F
Famotidine	Cluster 3	Cluster B		Norverapamil	Cluster 1	Cluster F
Furosemide	Cluster 3	Cluster B		Pravastatin	Cluster 1	Cluster F
Hydromorphone	Cluster 3	Cluster B		Propanolol	Cluster 1	Cluster F
Mevastatin	Cluster 3	Cluster B		Simvastatin	Cluster 1	Cluster F
Morphine	Cluster 3	Cluster B		Triamterene	Cluster 1	Cluster F
Naproxen	Cluster 3	Cluster B		Trimethoprim	Cluster 1	Cluster F
Oxymorphone	Cluster 3	Cluster B		Warfarin	Cluster 1	Cluster F
Paroxetine	Cluster 3	Cluster B		Erythromycin	Cluster 2	Cluster D
Pioglitazone	Cluster 3	Cluster B		Erythromycin-anhydro	Cluster 2	Cluster D
Quetiapine	Cluster 3	Cluster B		Methotrexate	Cluster 2	Cluster D
Simvastatin	Cluster 3	Cluster B		Tadalafil	Cluster 2	Cluster D
Sulfamethoxazole	Cluster 3	Cluster B		Valsartan	Cluster 2	Cluster D
Sumatriptan	Cluster 3	Cluster B		Chlorotetracycline	Cluster 2	Cluster E
Triclosan	Cluster 3	Cluster B		Glyburide	Cluster 2	Cluster E
Trimethoprim	Cluster 3	Cluster B		Oxymorphone glucuronide	Cluster 2	Cluster E
m-Hydroxybenzoylecgonine	Cluster 3	Cluster B		Sildenafil	Cluster 2	Cluster E
6-Acetylmorphine	Cluster 3	Cluster C		Tylosin	Cluster 2	Cluster E
Acebutolol	Cluster 3	Cluster C		Tylosin	Cluster 2	Cluster E
Albuterol	Cluster 3	Cluster C		Atorvastatin	Cluster 2	Cluster F
Amitriptyline	Cluster 3	Cluster C		Montelukast	Cluster 2	Cluster F
Carbamazepine	Cluster 3	Cluster C		Acetaminophen	Cluster 3	Cluster D
Carbamazepine 10,11 epoxide	Cluster 3	Cluster C		Amphetamine	Cluster 3	Cluster D
Celecoxib	Cluster 3	Cluster C		Caffeine	Cluster 3	Cluster D
Clopidogrel carboxylic acid	Cluster 3	Cluster C		Clenbuterol	Cluster 3	Cluster D
Desmethylcitalopram	Cluster 3	Cluster C		Cocaine	Cluster 3	Cluster D
Desmethylvenlafaxine	Cluster 3	Cluster C		Cotinine	Cluster 3	Cluster D
Diclofenac	Cluster 3	Cluster C		Desmethylvenlafaxine	Cluster 3	Cluster D
Diltiazem	Cluster 3	Cluster C		Dextromethorphan	Cluster 3	Cluster D
Donepezil	Cluster 3	Cluster C		Diphenhydramine	Cluster 3	Cluster D
Duloxetine	Cluster 3	Cluster C		Ecgonine methyl ester	Cluster 3	Cluster D
EDDP	Cluster 3	Cluster C		Fluoxetine	Cluster 3	Cluster D
Escitalopram	Cluster 3	Cluster C		Gabapentin	Cluster 3	Cluster D
Fentanyl	Cluster 3	Cluster C		Ibuprofen	Cluster 3	Cluster D
Hydrochlorothiazide	Cluster 3	Cluster C		MDEA	Cluster 3	Cluster D
Hydrocodone	Cluster 3	Cluster C		MDMA	Cluster 3	Cluster D
Lamotrigine	Cluster 3	Cluster C		Meperidine	Cluster 3	Cluster D
Loratadine	Cluster 3	Cluster C		Metformin	Cluster 3	Cluster D
Methadone	Cluster 3	Cluster C		Phenylpropanolamine	Cluster 3	Cluster D
Modafinil	Cluster 3	Cluster C		Tramadol	Cluster 3	Cluster D
Nifedipine	Cluster 3	Cluster C		Triclosan	Cluster 3	Cluster D
Nifedipine oxidized	Cluster 3	Cluster C		n-Butylparaben	Cluster 3	Cluster D
Norquetiapine	Cluster 3	Cluster C		Atrazine	Cluster 3	Cluster E
Norsertraline	Cluster 3	Cluster C		Bupropion	Cluster 3	Cluster E
Norverapamil	Cluster 3	Cluster C		Carisoprodol	Cluster 3	Cluster E
Omeprazole	Cluster 3	Cluster C		Chlorpheniramine	Cluster 3	Cluster E
Oxazepam	Cluster 3	Cluster C		Hydroxybupropion	Cluster 3	Cluster E
Oxcarbazepine	Cluster 3	Cluster C		Levorphanol	Cluster 3	Cluster E
Oxycodone	Cluster 3	Cluster C		Lidocaine	Cluster 3	Cluster E
Phenytoin	Cluster 3	Cluster C		Mefenamic acid	Cluster 3	Cluster E
Propanolol	Cluster 3	Cluster C		Meprobamate	Cluster 3	Cluster E
Sertraline	Cluster 3	Cluster C		Methamphetamine	Cluster 3	Cluster E
Sulfamethazine	Cluster 3	Cluster C		Methylparaben	Cluster 3	Cluster E
Temazepam	Cluster 3	Cluster C		Metoprolol	Cluster 3	Cluster E
Thiabendazole	Cluster 3	Cluster C		Norfentanyl	Cluster 3	Cluster E
Triamterene	Cluster 3	Cluster C		Norfluoxetine	Cluster 3	Cluster E
Triclocarban	Cluster 3	Cluster C		Normeperidine	Cluster 3	Cluster E
Warfarin	Cluster 3	Cluster C		Phenmetrazine	Cluster 3	Cluster E
Zolpidem	Cluster 3	Cluster C		Phentermine	Cluster 3	Cluster E
				Primidone	Cluster 3	Cluster E
				Ritalinic acid	Cluster 3	Cluster E
				Venlafaxine	Cluster 3	Cluster E
				Cocaethylene	Cluster 3	Cluster F
				Monoethylglycinexylidide	Cluster 3	Cluster F
				Naproxen	Cluster 3	Cluster F
				Sotalol	Cluster 3	Cluster F
				gemfibrozil	Cluster 3	Cluster F

## Sheet: Table S6
Supplementary Table S6.
Category-Wise Percentage of Overlapping PPCPs Between K-Means Clustering (Abraham Descriptors) and C1/C2 Clusters for Potable and Non-Potable Reuse Facilities
	Percentage_C1_non_potable	Percentage_C1_potable	Percentage_C2_non_potable	Percentage_C2_potable
Analgesics	9.30233	16.2791	11.6279	12.7907
Antidepressant	8.13953	10.4651	9.30233	11.6279
Antianxiety Drugs	6.97674	4.65116	8.13953	4.65116
Antihypertensives	6.97674	11.6279	9.30233	4.65116
Beta-Blockers	3.48837	3.48837	3.48837	2.32558
Antihistamines	3.48837	3.48837	2.32558	1.16279
Metabolites	2.32558	2.32558	2.32558	4.65116
Seductives	2.32558	4.65116	2.32558	1.16279
Bronchodilators	2.32558	3.48837	1.16279	1.16279
Sleeping Drugs	2.32558	2.32558	3.48837	1.16279
Anticoagulants	2.32558	2.32558	2.32558	0
Anti-Inflammatories	2.32558	4.65116	2.32558	1.16279
Anticonvulsant	2.32558	3.48837	3.48837	1.16279
Sympathomimetic amines	2.32558	1.16279	3.48837	2.32558
Drug Testing	1.16279	1.16279	1.16279	1.16279
Hypoglycemics	1.16279	2.32558	1.16279	2.32558
Statins	1.16279	0	1.16279	1.16279
Antiarrhythmics	1.16279	1.16279	0	0
Cold Cures	1.16279	1.16279	0	0
Antacids	1.16279	2.32558	1.16279	1.16279
Antiepileptic	1.16279	3.48837	3.48837	1.16279
Antibiotic	1.16279	6.97674	3.48837	3.48837
Antifungal	1.16279	1.16279	1.16279	0
muscle relaxants	1.16279	0	1.16279	1.16279
Cough Suppressants	1.16279	1.16279	1.16279	0
Personal Care Products	1.16279	1.16279	0	1.16279
Antibacterial	0	2.32558	1.16279	1.16279
Agricultural chemicals	0	1.16279	1.16279	1.16279
Antipsychotics	0	0	0	1.16279
